# Supplementary material
Source: Research Square preprint supplement (doi:10.21203/rs.3.rs-9268669/v1)
Supplement: Supplementary file 1 [file 017ea1e136eaeec910869922.docx]

**Table S2.** **Comparison of Areas Under the Receiver Operating Characteristic Curve Among FNA Recommendation Models for Thyroid Nodules**

| Model | Model 1 | Model 2 | Model 3 | Model 4 |
| --- | --- | --- | --- | --- |
| Model 1 | NA | 0.073 | <0.001 | 0.007 |
| Model 2 | 0.073 | NA | <0.001 | <0.001 |
| Model 3 | <0.001 | <0.001 | NA | 0.008 |
| Model 4 | 0.007 | <0.001 | 0.008 | NA |

p < 0.05 indicates a statistically significant difference. Model 1 is conventional US features, model 2 is model 1 combined with CEUS features, model 3 is management of C-TIRADS, model 4 is management of ACR TI-RADS.

NA, not applicable; US, ultrasound; CEUS, contrast-enhanced ultrasound; C-TIRADS, Chinese Thyroid Imaging Reporting and Data System; ACR TI-RADS, American College of Radiology Thyroid Imaging Reporting and Data System. FNA, fine-needle aspiration.
