# Supplementary material
Source: Research Square preprint supplement (doi:10.21203/rs.3.rs-9268669/v1)
Supplement: Supplementary file 2 [file 137ef7c1cf79cbcac9732ed7.docx]

**Table S1. Inter-observer Agreement for Conventional US and CEUS Features**

| Feature | κ | *P* |
| --- | --- | --- |
| Conventional US |  |  |
| Cystic–solid/Solid | 0.885(0.494-1.000) | <0.001 |
| Markedly hypoechoic (no/yes) | 0.779(0.560-0.943) | <0.001 |
| Aspect ratio (≤1/>1) | 0.894(0.797-0.966) | <0.001 |
| Smooth margin/Irregular or ill-defined margin or ETE | 0.788(0.686-0.878) | <0.001 |
| Punctate echogenic foci(no/yes) | 0.892(0.795-0.965) | <0.001 |
| Large comet-tail artifacts(no/yes) | 1.000(0.500-1.000) | <0.001 |
| CEUS |  |  |
| Enhancement direction (scattered /centripetal or centrifugal/indeterminate) | 0.783(0.670-0.874) | <0.001 |
| Ring enhancement(no/yes) | 0.857(0.653-1.000) | <0.001 |
| Persistent perfusion defects (no/yes) | 0.806(0.652-0.929) | <0.001 |
| Margin sharpness in the washout phase (indistinct vs sharp) | 0.743(0.546-0.892) | <0.001 |
| Hypoenhancement (no/yes) | 0.770(0.654-0.869) | <0.001 |
| Non-enhancing peripheral halo (no/yes) | 0.811(0.549-1.000) | <0.001 |
| Capsular enhancement continuity (continuous vs interrupted) | 0.713(0.547-0.851) | <0.001 |
| Washout timing relative to surrounding thyroid parenchyma (earlier/synchronous or delayed) | 0.773(0.666-0.876) | <0.001 |

Data in parentheses are 95% confidence intervals. Agreement level = Almost perfect: 0.8 < *κ* ≤ 1, Substantial: 0.6 < *κ* ≤ 0.8, Moderate: 0.4 < *κ* ≤ 0.6, Fair: 0.2 < *κ* ≤ 0.4, Slight: 0 < *κ* ≤ 0.2, Poor: *κ* ≤ 0. P < 0.05 indicates a significant difference. US, Ultrasound; CEUS, contrast-enhanced ultrasound; *κ*, Cohen’s kappa.
