# Supplementary material
Source: Research Square preprint supplement (doi:10.21203/rs.3.rs-9268669/v1)
Supplement: Supplementary file 3 [file 9cae8b1586e9ce534ae4b2da.docx]

**Table S3. Performance of Each Model at a given Risk Threshold for FNA of Thyroid Nodules**

| Performance Parameter | Risk Threshold, % | Model 1 | Model 2 | Model 3 | Model 4 |
| --- | --- | --- | --- | --- | --- |
| FPR, % | 10 | 100.0 (48.5-100.0) | 87.7 (36.2-100.0) | 100.0 (100.0-100.0) | 100.0 (100.0-100.0) |
| 50 | 21.1 (13.5-47.4) | 19.3 (10.0-34.6) | 100.0 (31.2-100.0) | 59.7 (11.1-70.5) |
| 64 | 21.1 (8.9-32.6) | 17.5 (7.4-24.5) | 0.0 (0.0-51.1) | 21.1 (7.9-51.0) |
| 86 | 7.0 (0.0-15.5) | 8.8 (1.5-13.0) | 0.0 (0.0-0.0) | 0.0 (0.0-12.2) |
| TPR, % | 10 | 100.0 (98.7-100.0) | 100.0 (97.2-100.0) | 100.0 (100.0-100.0) | 100.0 (100.0-100.0) |
| 50 | 67.6 (62.1-96.2) | 79.7 (70.6-93.1) | 100.0 (47.1-100.0) | 83.8 (47.2-90.9) |
| 64 | 67.6 (47.1-84.2) | 78.4 (56.8-88.0) | 0.0 (0.0-68.0) | 54.1 (39.7-84.0) |
| 86 | 35.1 (10.8-61.8) | 44.6 (21.2-67.1) | 0.0 (0.0-0.0) | 0.0 (0.0-58.8) |
| FNR, % | 10 | 0.0 (0.0-1.3) | 0.0 (0.0-2.8) | 0.0 (0.0-0.0) | 0.0 (0.0-0.0) |
| 50 | 32.4 (3.8-37.9) | 20.3 (6.9-29.4) | 0.0 (0.0-52.2) | 16.2 (9.1-52.8) |
| 64 | 32.4 (15.9-52.9) | 21.6 (12.0-43.2) | 100.0 (32.0-100.0) | 46.0 (16.0-60.3) |
| 86 | 64.9 (38.2-89.2) | 55.4 (32.9-78.8) | 100.0 (100.0-100.0) | 100.0 (41.2-100.0) |
| TNR, % | 10 | 0.0 (0.0-51.5) | 12.3 (0.0-63.8) | 0.0 (0.0-0.0) | 0.0 (0.0-0.0) |
| 50 | 79.0 (52.6-86.5) | 80.7 (65.5-90.0) | 0.0 (0.0-68.5) | 40.4 (29.6-88.9) |
| 64 | 79.0 (67.4-91.1) | 82.5 (75.5-92.6) | 100.0 (48.9-100.0) | 79.0 (49.0-92.1) |
| 86 | 93.0 (84.5-100.0) | 91.2 (87.0-98.5) | 100.0 (100.0-100.0) | 100.0 (87.8-100.0) |
| NB, % | 10 | 51.7 (43.2-61.0) | 52.3 (43.2-60.7) | 51.7 (42.3-61.0) | 51.7 (42.3-61.0) |
| 50 | 29.0 (19.9-46.6) | 36.6 (26.0-50.4) | 13.0 (0.8-29.8) | 21.4 (11.5-35.1) |
| 64 | 21.9 (7.6-38.0) | 30.7 (14.1-44.5) | 0.0 (0.0-13.1) | 14.3 (1.1-27.5) |
| 86 | 1.1 (-8.9-22.0) | 1.7 (-13.0-28.7) | 0.0 (0.0-0.0) | 0.0 (0.0-5.3) |
| sNB, % | 10 | 91.4 (88.4-94.6) | 92.5 (89.1-96.5) | 91.4 (88.0-94.0) | 91.4 (88.0-94.0) |
| 50 | 51.4 (39.4-75.3) | 64.9 (49.3-81.3) | 23.0 (1.6-45.9) | 37.8 (22.7-55.3) |
| 64 | 38.7 (14.5-60.7) | 54.4 (27.8-73.8) | 0.0 (0.0-21.4) | 25.2 (2.1-44.4) |
| 86 | 1.9 (-17.5-37.1) | 3.1 (-24.2-48.3) | 0.0 (0.0-0.0) | 0.0 (0.0-8.6) |
| NRFP, % | 10 | 0.0 (0.0-12.2) | 5.3 (-5.3-27.5) | 0.0 (0.0-0.0) | 0.0 (0.0-0.0) |
| 50 | 16.0 (10.7-29.8) | 23.7 (16.0-35.9) | 0.0 (0.0-0.0) | 8.4 (0.8-21.4) |
| 64 | 24.1 (14.5-34.5) | 29.0 (18.8-38.3) | 11.7 (2.0-23.7) | 19.8 (9.7-30.4) |
| 86 | 34.5 (25.6-44.3) | 34.6 (26.7-44.9) | 34.3 (24.6-43.2) | 34.3 (25.4-44.1) |

Data in parentheses are 95% CIs. Model 1 is conventional US features, model 2 is model 1 combined with CEUS features, model 3 is management of C-TIRADS, model 4 is management of ACR TI-RADS.

FNA, fine-needle aspiration; FPR, false-positive rate; TPR, true-positive rate; FNR, false-negative rate; TNR, true-negative Rate; NB, net benefit; sNB, standardized net benefit; NRFP, net reduction in false-positives; C-TIRADS, Chinese Thyroid Imaging Reporting and Data System; ACR TI-RADS, American College of Radiology Thyroid Imaging Reporting and Data System.
