# Supplementary material
Source: Research Square preprint supplement (doi:10.21203/rs.3.rs-9268669/v1)

**Figure S1：**Calibration curves and Brier scores of models for recommending FNA in thyroid nodules. Numbers in parentheses are 95% CIs. Model 2 and model 3 had the highest and the lowest calibration, respectively. Model 1 is conventional US features, model 2 is model 1 combined with CEUS features, model 3 is management of C-TIRADS, model 4 is management of ACR TI-RADS. Brier score, the degree of calibration; the higher the score, the worse the calibration; in contrast, the closer to 0, the better. US, ultrasound; CEUS, contrast-enhanced ultrasound; C-TIRADS, Chinese Thyroid Imaging Reporting and Data System; ACR TI-RADS, American College of Radiology Thyroid Imaging Reporting and Data System.


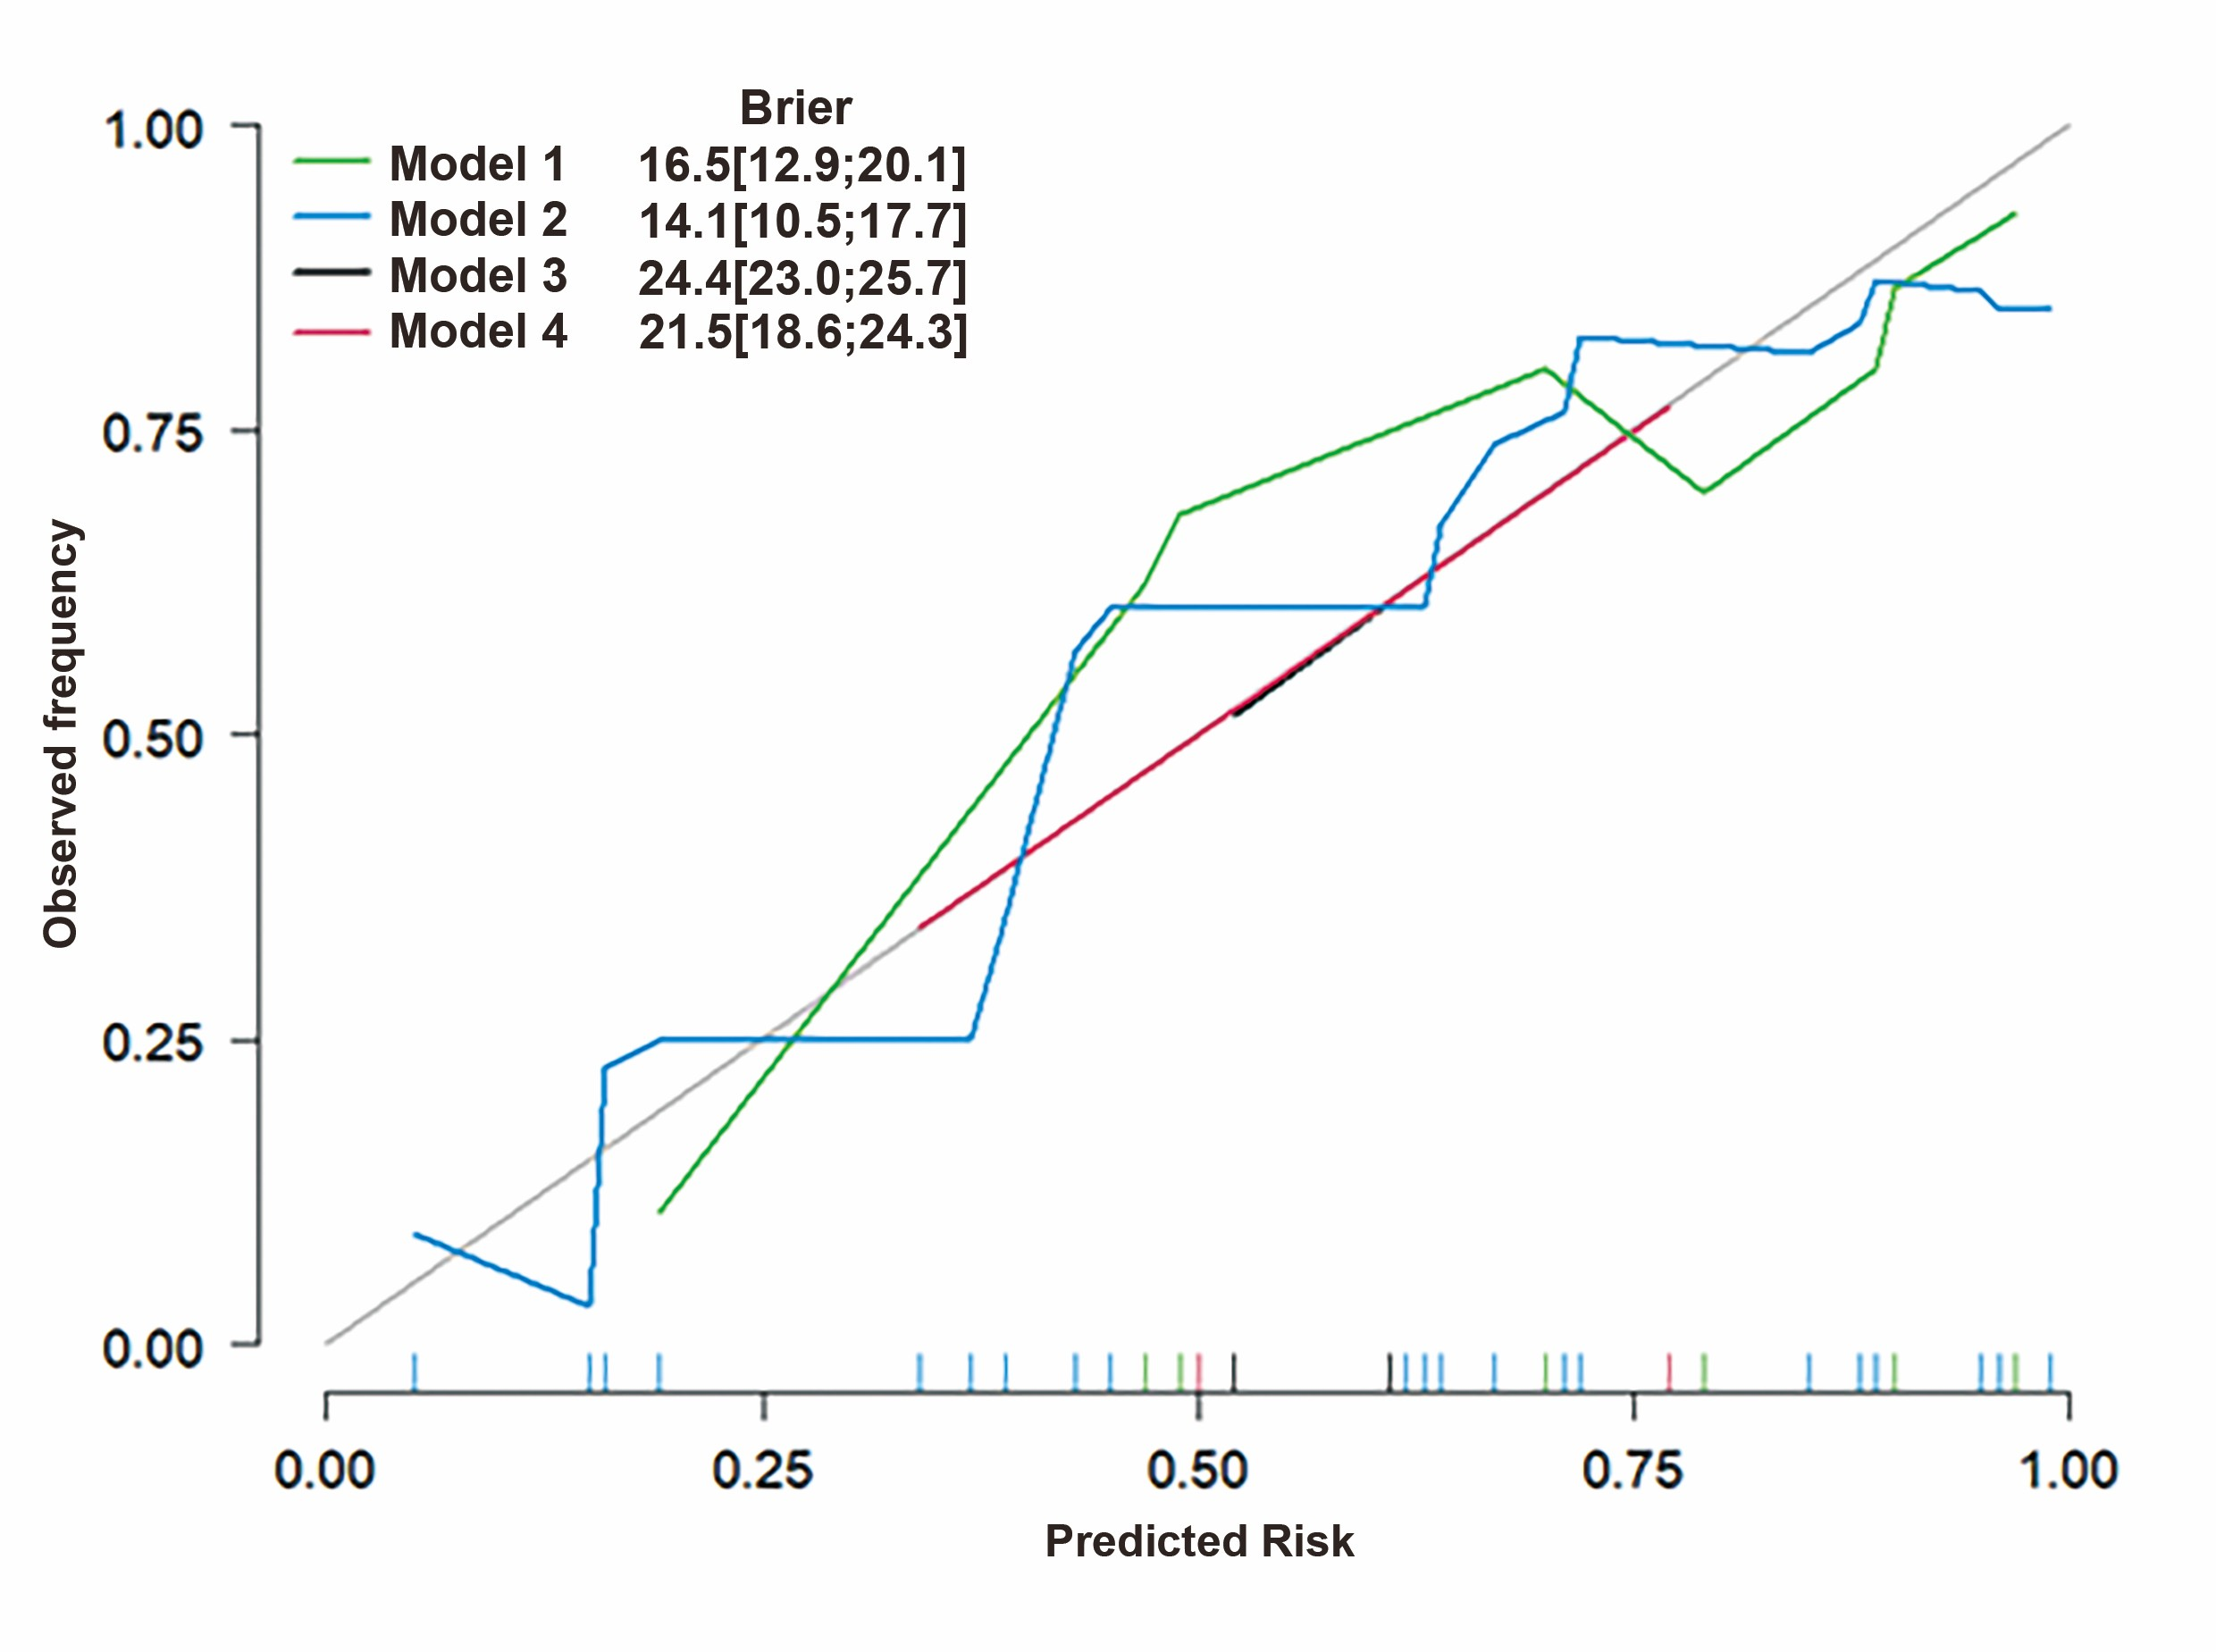

Supplement: Supplementary file 4 [file b865db081a38608e1a96f40c.docx]
